# Supplementary material
Source: Royal Society of Chemistry journal article supplement (doi:10.1039/d6nj00243a)
Supplement: d6nj00243a1.pdf [file d6nj00243a1.pdf]

# **Degradable photoactivated metal organic frameworks with an oxidase-like nanozyme for colorimetric detection of galantamine**

Zhiping Xu, <sup>[a]</sup> Jun Zhang, <sup>[a]</sup> Wenzhu Jiang, <sup>[a]</sup> Lin Zhang \* <sup>[a]</sup>

*[a] Shenyang Key Laboratory of Medical Molecular Theranostic Probes in School of Pharmacy, Shenyang Medical College · Shenyang 110034, China.*

Corresponding Authors: E-mail: zl210503@163.com

## **Table of content:**

|                           |   |
|---------------------------|---|
| Supplementary Figure..... | 2 |
| Supplementary Tables..... | 3 |
| References.....           | 3 |

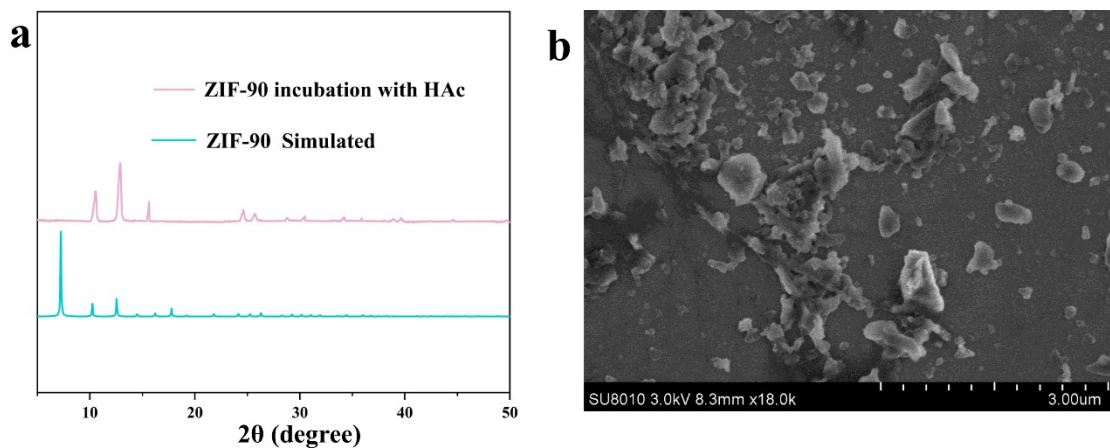

Fig. S1. (a) PXRD patterns (b) SEM image of ZIF-90 after incubation with acetic acid.

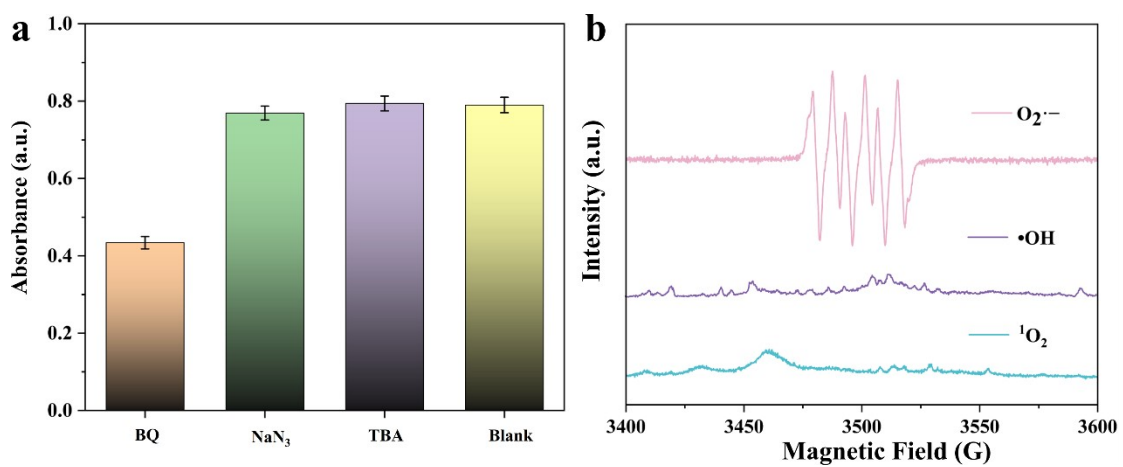

Fig. S2. (a) The catalytic oxidation of TMB in the presence of various radical quenchers, (b) ESR spectra of the ZIF-90 after irradiation

**Table S1.** Sensing performance comparison between the biosensors in this work and some reported sensors for AChE inhibitors.

| Biosensor         | Analyte      | Linear range                          | Detection limit           | Reference |
|-------------------|--------------|---------------------------------------|---------------------------|-----------|
| colorimetric      | paraoxon     | 80–600 ng/mL                          | 11 ng/mL                  | 1         |
| fluorometric      | carbaryl     | 0.05–50 $\mu$ M                       | 0.8 nM                    | 2         |
| colorimetric      | carbaryl     | 0.05–50 $\mu$ M                       | 1.6 nM                    | 2         |
| colorimetric      | TPP          | 0 -1000 ng mL <sup>-1</sup>           | 0.201 ng mL <sup>-1</sup> | 3         |
| chemiluminescence | tacrine      | 0- 0.78 $\mu$ M                       | 21.9 nmol L <sup>-1</sup> | 4         |
| fluorometric      | fenitrothion | 0.1 - 500 ng/mL                       | 0.037 ng/mL               | 5         |
| colorimetric      | huperzine A  | 5–500 nM                              | 4.17 nM                   | 6         |
| colorimetric      | paraoxon     | 0–30 ng mL <sup>-1</sup>              | 1.07 ng/mL                | 7         |
| colorimetric      | galantamine  | 10 <sup>-11</sup> -10 <sup>-5</sup> M | 3.15pM                    | this work |

## References

- [1] R. J. Fu, J. Zhou, Y. W. Wang, Y. L. Liu, H. R. Liu, Q. Yang, Q. Y. Zhao, B. N. Jiao, Y. He, Oxidase-like nanozyme-mediated altering of the aspect ratio of gold nanorods for breaking through H<sub>2</sub>O<sub>2</sub>-supported multicolor colorimetric assay: application in the detection of acetylcholinesterase activity and its inhibitors, *ACS Appl. Bio Mater.*, 2021, **4**, 3539–3546.
- [2] D. H. Wu, Q. L. Zhao, Y. Wang, B. Zhang, X. Q. Tang, J. Talap, J. Sun, X. R. Yang, Fluorescent iron-doped polymer dot nanozyme-based cascade system for dual-mode detection of acetylcholinesterase activity and its inhibitors, *Anal. Chem.*, 2024, **96**, 15682–15691.
- [3] X. Z. Yu, L. M. Zhang, X. He, W. Y. Bai, H. L. Tan, Q. Li, Y. Shen, Y. S. Luo, Y. C. Yao, S. F. Li, H. Bai, J. Hu, W. H. Zhuang, L. Chen, X. P. Sun, W. C. Hu, Gold nanoparticles decorated CoAl LDH monolayer: a peroxidase like nanozyme for sensitive colorimetric detection of acetylcholinesterase and inhibitors, *Inorg. Chem.*, 2024, **63**, 24065–24070.
- [4] Y. P. Lai, S. S. He, Y. Y. Chen, T. R. Lin, L. Hou, S. L. Zhao, Hydrogen-Bonded organic framework nanozyme with multi enzyme activity for chemiluminescence sensing of acetylcholinesterase and screening its inhibitors, *Anal. Chem.*, 2025, **97**, 8362–8369.
- [5] L. Wang, Y. Pan, Z.W. Wang, Y.F. Wang, X.L. Wei, Ultrasensitive fluorescence platform based on AgNPs in situ incorporated Zr-MOFs for the detection of organophosphorus pesticides, *ACS Appl. Mater. Interfaces*, 2023, **15**, 44109–44118.
- [6] Y. W. Mao, J. Zhang, R. Zhang, J. Q. Li, A.J. Wang, X. C.Zhou, J. J. Feng, N-Doped carbon nanotubes supported Fe–Mn dual-single-atoms nanozyme with synergistically enhanced peroxidase activity for sensitive colorimetric detection of acetylcholinesterase and its Inhibitor, *Anal. Chem.*, 2023, **95**, 8640–8648.
- [7] D. W. Liang, Y. W. Wang, L. R. Ma, Y. L. Liu, R. J. Fu, H. R. Liu, Y. L. Peng, Y. H. Zhang, C. Q. Wang, B. N. Jiao, Y. He, Controlled growth of gold nanobipyramids using thiocholine for plasmonic colorimetric detection of organophosphorus pesticides, *ACS Appl. Nano Mater.* 2022, **5** 16978–16986.
